# Supplementary material for: Maternal NAT10 orchestrates oocyte meiotic cell-cycle progression and maturation in mice
Source: PubMed Central journal article supplement (PMC10287700; doi:10.1038/s41467-023-39256-0), 2023-06-22
Supplement: 41467_2023_39256_MOESM3_ESM.pdf [file 41467_2023_39256_MOESM3_ESM.pdf]

## **Description of Additional Supplementary Files**

File name: Supplementary Data 1

Description: Primer sequences for genotyping and Real-time PCR

File name: Supplementary Data 2

Description: Mini-bulk SMART-seq2, PAT, Ribo-seq and acRIP-seq

File name: Supplementary Data 3

Description: Quality control of RNA-seq results

File name: Supplementary Data 4

Description: DEGs between WT and Nat10-ZcKO GV oocytes

File name: Supplementary Data 5

Description: DEGs between WT and Nat10-ZcKO MII oocytes
